# Supplementary material
Source: PubMed Central journal article supplement (PMC4827927)
Supplement: NIHMS772824-supplement-Supporting_Information.pdf [file NIHMS772824-supplement-Supporting_Information.pdf]

# Portable X-ray fluorescence spectroscopy as a rapid screening technique for analysis of TiO<sub>2</sub> and ZnO in sunscreens

Venu Gopal Bairi, Jin-Hee Lim\*, Ivan R. Quevedo, Thilak K. Mudalige, and Sean W. Linder\*

Office of Regulatory Affairs, Arkansas Regional Laboratory, U.S. Food and Drug Administration, 3900 NCTR Road, Jefferson, Arkansas 72079, United States.

## Supporting Information:

### 1. Matrix composition

**Matrix A:** Avobenzene (2%), Homosalate (13%), Octisalate (5%), Octocrylene (2%), Oxybenzene (4%), Aluminum Starch Octenylsuccinate, Benzyl Alcohol, Carbomer, Dimethicone, Disodium EDTA, VP/Icosene Copolymer and Methylparaben

**Matrix B:** Avobenzene (3%), Homosalate (5%), Octisalate (5%), Octocrylene (7%), Oxybenzene (6%), Archidyl Alcohol, Alcohol Denatured, Benzyl alcohol, Cyclopenta siloxane, Dimethicone, Disodium EDTA, Ethyl paraben, Glyceryl Stearate, Glycerin, Isodecyl neopentionate and Laureth-7

**Matrix C:** Avobenzene (3%), Octisalate (5%), Octocrylene (3%), Aloe Barbadensis Leaf Juice, Allantoin, Borage Oil, Carbomer, Capric Caprylic Triglycerides, Cetyl Alcohol, Citrus Lemon Peak Oil, Dimethicone, Emblica Officinalis Fruit, Ethyl Hexyl Glycerin, Flax Seed Oil, Fragrance, Glyceryl Stearate, Honey, Heat Shock Proteins and Lecithin

## 2. Standard calibration curves

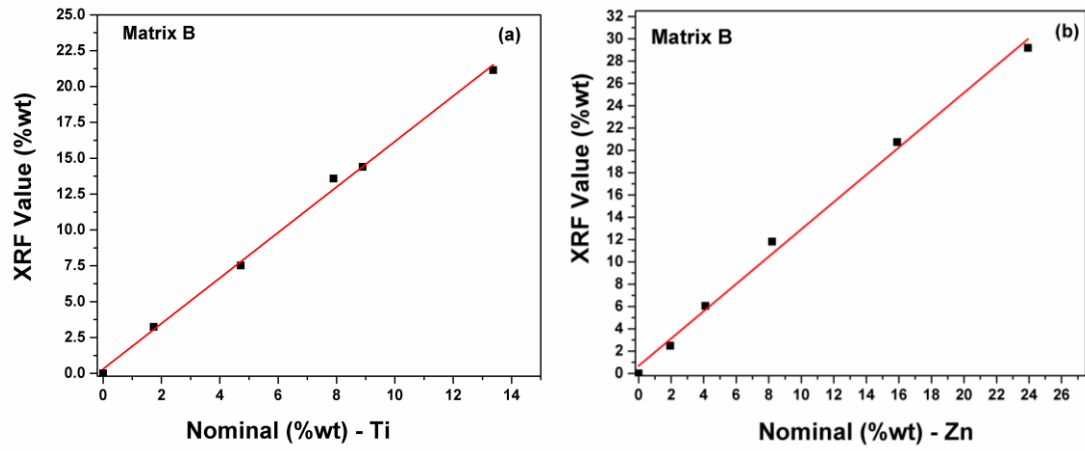

**Figure S1.** (a) Calibration curve of [Ti]-working standards prepared by using matrix B. (b) Calibration curve of [Zn]-working standards prepared by using matrix B.

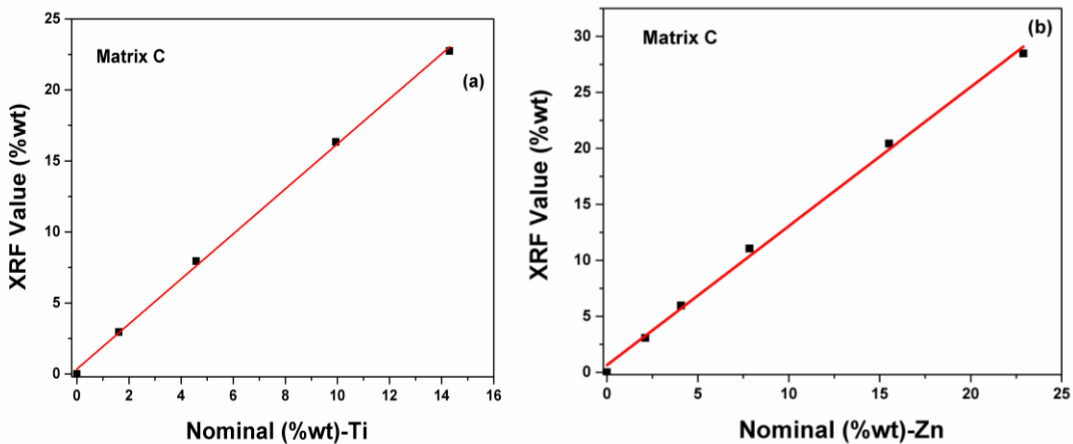

**Figure S2.** (a) Calibration curve of [Ti]-working standards prepared by using matrix C. (b) Calibration curve of [Zn]-working standards prepared by using matrix C.
